# Supplementary material for: Modulation of Fat Deposition–Gut Interactions in Obese Mice by Administrating with Nobiletin
Source: MDPI journal article supplement (doi:10.3390/genes14051062), 2023-05-10
Supplement: s1 [file s1]

## Supplementary Information

**Title:** Modulation of fat deposition-gut interactions in obese mice by administrating with nobiletin

Cunzhen Zhao, Jiahua Guo, Chunyu Du, Yongjie Xu\*

### Supplementary Table1

Data preprocessing statistics and quality control

| Sample Name | Raw PE | Combined | Clean Tags | Effective Tags | Base(nt)   | AvgLen(nt) | GC%   | Effective% |
|-------------|--------|----------|------------|----------------|------------|------------|-------|------------|
| NC.1.1      | 84,132 | 83,237   | 81,586     | 64,621         | 27,113,546 | 420        | 51.77 | 76.81      |
| NC.1.2      | 87,500 | 86,422   | 84,706     | 65,993         | 27,834,704 | 422        | 51.9  | 75.42      |
| NC.1.3      | 99,814 | 99,011   | 97,063     | 68,778         | 28,735,062 | 418        | 54.16 | 68.91      |
| NC.1.4      | 82,707 | 82,035   | 80,514     | 63,996         | 26,710,598 | 417        | 53.53 | 77.38      |
| NC.1.5      | 87,021 | 86,270   | 84,709     | 61,195         | 25,760,411 | 421        | 53.49 | 70.32      |
| NC.2.1      | 97,520 | 96,637   | 94,893     | 63,095         | 26,259,589 | 416        | 53.64 | 64.7       |
| NC.2.2      | 97,445 | 95,434   | 93,387     | 62,356         | 26,164,022 | 420        | 52    | 63.99      |
| NC.2.3      | 85,544 | 84,804   | 83,030     | 62,311         | 26,249,021 | 421        | 53.67 | 72.84      |
| NC.2.4      | 87,175 | 86,418   | 85,028     | 62,694         | 25,986,157 | 414        | 54.38 | 71.92      |
| NC.2.5      | 98,228 | 97,014   | 95,607     | 61,951         | 26,009,450 | 420        | 53.62 | 63.07      |
| HF.1.1      | 82,051 | 80,931   | 79,246     | 60,688         | 25,488,673 | 420        | 51.02 | 73.96      |
| HF.1.2      | 92,377 | 91,090   | 89,717     | 60,232         | 25,188,828 | 418        | 53.44 | 65.2       |
| HF.1.3      | 85,036 | 84,104   | 82,772     | 63,193         | 26,457,082 | 419        | 53.08 | 74.31      |
| HF.1.4      | 93,109 | 92,458   | 91,058     | 62,037         | 25,744,927 | 415        | 53.52 | 66.63      |
| HF.1.5      | 83,844 | 82,812   | 81,542     | 69,218         | 28,632,262 | 414        | 51.93 | 82.56      |
| HF.2.1      | 92,835 | 91,982   | 90,454     | 67,005         | 27,795,099 | 415        | 52.76 | 72.18      |
| HF.2.2      | 59,344 | 58,961   | 58,038     | 42,934         | 17,774,144 | 414        | 53.71 | 72.35      |
| HF.2.3      | 97,627 | 96,932   | 95,263     | 65,391         | 27,180,947 | 416        | 53.85 | 66.98      |
| HF.2.4      | 90,620 | 89,950   | 88,593     | 65,965         | 27,140,962 | 411        | 54.22 | 72.79      |
| HF.2.5      | 97,646 | 96,868   | 95,552     | 67,932         | 27,952,274 | 411        | 53.51 | 69.57      |
| Average     | 89079  | 88169    | 86638      | 63079          | 26308888   | 417        | 53    | 71         |
